# Supplementary material
Source: PubMed Central journal article supplement (PMC2394945)
Supplement: supp_74_10_3171__2.pdf [file supp_74_10_3171__2.pdf]

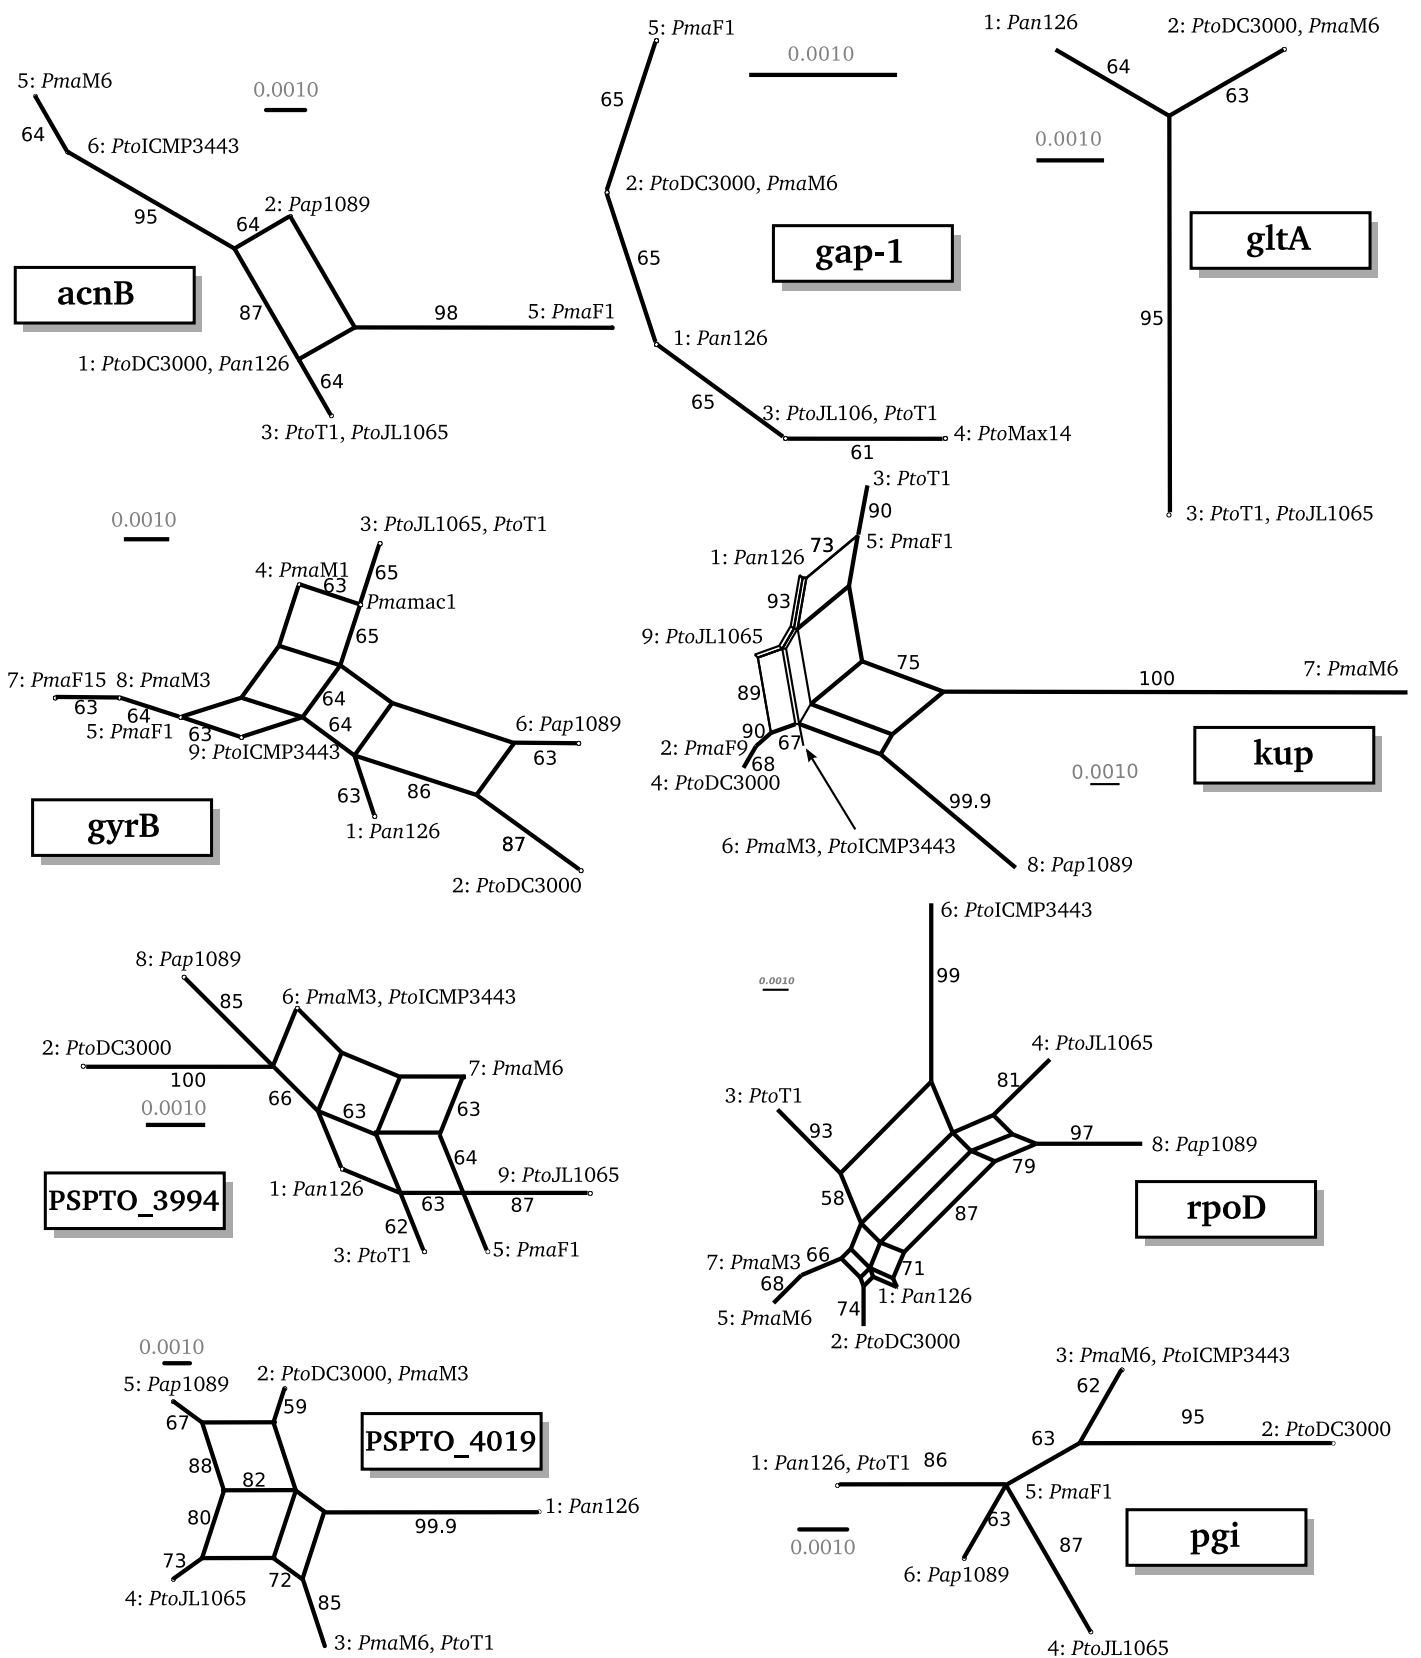

Figure S2. Separate Neighbor-Net analysis of the nine housekeeping genes *gyrB*, *rpoD*, *pgi*, *gap-1*, *gltA*, *acnB*, *kup*, *PSPTO\_3994*, and *PSPTO\_4019*. Phylogenetic networks of individual gene fragments built with SplitsTree4 (27) using the Neighbor-Net algorithm (5). One representative isolate is indicated for each sequence type (see Table 2 for identical isolates).
