# Supplementary material
Source: PubMed Central journal article supplement (PMC2394945)
Supplement: supp_74_10_3171__3.pdf [file supp_74_10_3171__3.pdf]

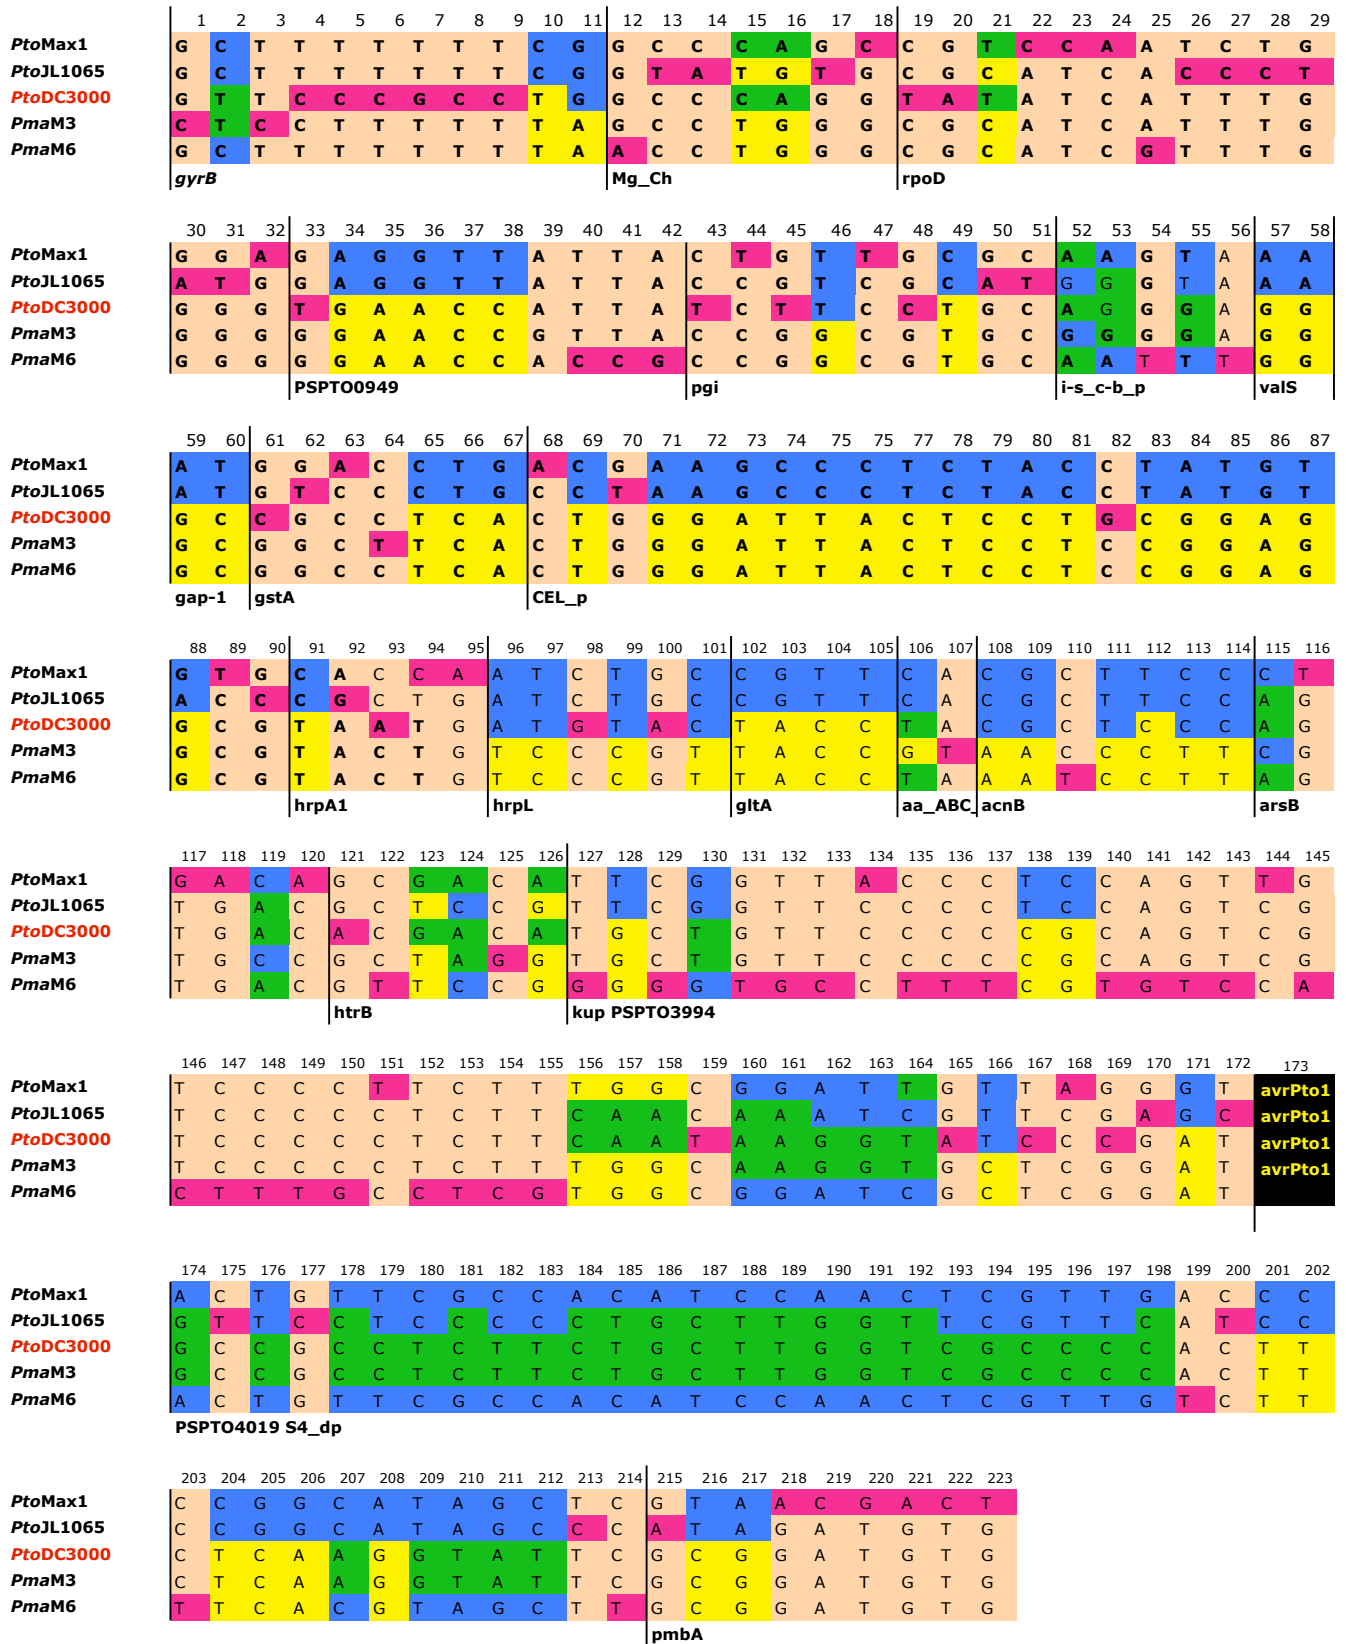

Figure S3

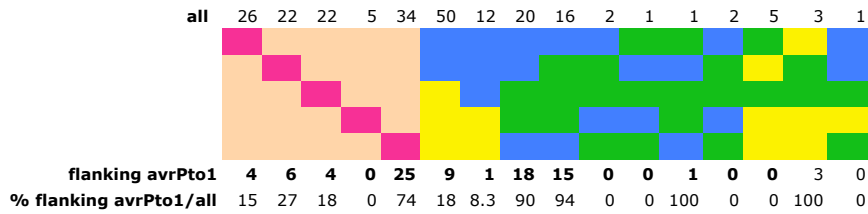

Figure S3. Nucleotide substitution patterns in the genomic regions flanking the avrPto1 PAI compared to other genomic regions. Nucleotide substitution patterns for PtoMax1, PtoJL1065, PtoDC3000, PmaM3, and PmaM6 are shown for polymorphic sites in twenty-three gene fragments. For non-informative polymorphic sites the nucleotides are color coded in pink and hot pink. For informative sites the PtoMax1 and PtoJL1065 nucleotides were color coded in blue, the PtoDC3000 nucleotides in green, and the PmaM3 and PmaM6 nucleotides in yellow. When a PtoDC3000 nucleotide is identical to the PtoMax and PtoJL1065 nucleotide at a certain position, the PtoDC3000 nucleotide was also colored in blue. The same principle was followed for all patterns. At the end of the alignment, a summary of substitution patterns is given indicating the number of positions that have the same substitution pattern and the number of positions that have these patterns in the core genome regions flanking the avrPto1 region.
