# Supplementary material
Source: PubMed Central journal article supplement (PMC2394945)
Supplement: supp_74_10_3171__4.pdf [file supp_74_10_3171__4.pdf]

**Supplementary Table 1: Genes, genome locations, primers, length of products**

| PID      | name                                           |           | position in <i>Pto</i> DC3000 genome | forward primer                    | reverse primer         | length of analyzed sequence |
|----------|------------------------------------------------|-----------|--------------------------------------|-----------------------------------|------------------------|-----------------------------|
| 28867247 | DNA gyrase subunit B                           | gyrB      | 4147..6564                           | TGCVTTCGTTGARTACCTGA              | ACGGAAGAAGAAGGTSAGCA   | 701                         |
| na       | Magnesium chelatase pseudogene                 | Mg_Ch     | 81732..82382                         | ACYTGCTCCAGATCCGCC                | GCTGGAGGTTYTRCGTGAGCC  | 310                         |
| 28867765 | RNA polymerase sigma factor                    | rpoD      | 588846..590696                       | GAAGGCATCCGTGAAGTGAT <sup>1</sup> | GCCACGGTTGGTGTACTTCT   | 645                         |
| 28868169 | hypothetical protein                           | PSPTO0949 | 1026472..1028727                     | AYTGACCCGCSATYGTGCGAG             | AATGCGCTGAAACGCGCAG    | 674                         |
| 28868179 | glucose-6-phosphate isomerase                  | pgi       | 1040763..1042427                     | GCGTACTACCGYAMYCCB TC             | CCACATMGGRAARATRTTYT   | 569                         |
| 28868192 | iron-sulfur cluster-binding protein            | PSPTO0972 | 1057534..1057866                     | AGCGAYRCCCAGATBCCC                | YGCCRTGMGGGAARTTGAC    | 620                         |
| 28868479 | valyl-tRNA synthetase                          | valS      | 1389375..1392221                     | CCAGATACCAGTCGCAACTG              | TGGACCTTCTCCACGCTC     | 588                         |
| 28868497 | glyceraldehyde-3-phosphate dehydro             | gap-1     | 1415258..1416259                     | CGTATCGCAATCAACGGTTT              | GACTCTCCGTATCGCAATCA   | 600                         |
| 28868573 | glutathione S-transferase                      | gstA      | 1502901..1503527                     | GCGACCCGAAAASCAAYC                | RTAYTCVCCGCCCTGCTC     | 506                         |
| 28868577 | hopAA1-1 effector plus up-stream re            | hopAA1-1  | 1504948..1505427                     | ACTCCYTTGCTGGKTTGGAA              | KGTCGARCTTYTCCGCCTTG   | 677                         |
| 28868585 | type III effector avrE1 <sub>PtoDC3000</sub>   | avrE1     | 1514116..1519503                     | TTGTCGTTYTTCTGGGTCAR              | CMGAYATGGGCTTTACCGAT   | 636                         |
| 28868589 | type III helper protein HrpA1                  | hrpA1     | 1524281..1524622                     | GCCTGGARCTSGAYRTSCCAC             | CAGAVGCRCCRAARTTGTCRCC | 753                         |
| 28868612 | RNA polymerase sigma factor HrpL               | hrpL      | 1542838..1543392                     | GATCCGYAATCACTTCCG                | TCCTGATAATTGCCRTCCA    | 205                         |
| 28869396 | citrate synthase                               | gltA      | 2414332..2415621                     | WYTRACCGGYACMGTBGGY               | TGGGCTGATSGGYTTRATYT   | 507                         |
| 28869961 | amino acid ABC transporter                     | PSPTO2775 | 3094410..3095261                     | GGMGCRGACGGMAAGTTG                | CGGAAAACCGATTGCMGG     | 589                         |
| 28870907 | aconitate hydratase                            | acnB      | 4239241..4241841                     | TGATGTTTGATGCCTTCCAC              | TAAAACCTTGTTGCTTTCG    | 650                         |
| 28870953 | arsenical pump membrane protein                | arsB      | 4300065..4301345                     | TCAGYACGATRCCGACCTTG              | ACATCGTKTCGGCGGAYTAC   | 1094                        |
| 28871024 | lipid A biosynthesis lauroyl acyltransf        | htrB      | 4383469..4384401                     | ATACTGTTCCGGGCATTCTG              | CTTCTACAGGCATCGCCTTC   | 526                         |
| 28871138 | potassium uptake protein                       | kup       | 4503214..4505109                     | CTGATCTTCTGGTCGCTGATC             | TTCCAGGTGGTCATGAGGA    | 1943 <sup>1</sup>           |
| 28871137 | hypothetical protein                           | PSPTO3992 | 4505431..4506519                     | AYACCACCATCATCATTTGC              | CCGTACAGMAAMGGYACGAC   | 1943 <sup>1</sup>           |
| 28871145 | type III effector avrPto1 <sub>PtoDC3000</sub> | avrPto1   | 4514766..4515260                     | GTCATKGCAGTGTTATRCRAGA            | GYTGCAGGCTCCKAAAAACTG  | various <sup>2</sup>        |
| 28871162 | hypothetical protein                           | PSPTO4019 | 4530408..4531739                     | AAGGTTACGAAGTCGTTGCG              | CTCGCGCCAGTCTTGAT      | 720                         |
| 28871164 | S4 domain protein                              | PSPTO4021 | 4532376..4533086                     | GAGCTGGTCGGTTGCTCC                | GGCGTGTTTCTGATAAGTCG   | 1837                        |
| 28871598 | pmbA protein                                   | pmbA      | 5024076..5025422                     | GCTTGCGRCCGGAATAVG                | GCGCTGATGGCCAAAGAG     | 778                         |

1 F primer starts within Kup and PCR product encompasses intergenic region

2 primers are located in the genes up- and downstream of the *avrPto1* gene. The length of the product is different in different strains.
